# Supplementary material for: Nutrient Characterization in Soil Aggregate Fractions with Different Fertilizer Treatments in Greenhouse Vegetable Cultivation
Source: MDPI journal article supplement (doi:10.3390/agriculture12040440), 2022-03-22
Supplement: s1 [file s1]

## Supplementary Information

# Nutrient Characterization in Soil Aggregate Fractions with Different Fertilizer Treatments in Greenhouse Vegetable Cultivation

Jun Wang, Wei Dai, Kaikai Fang, Hui Gao, Zhimin Sha and Linkui Cao \*

School of Agriculture and Biology, Shanghai Jiao Tong University, 800 Dongchuan Road, Shanghai 200240, China; junwang88@sjtu.edu.cn (J.W.); dw0728@sjtu.edu.cn (W.D.); fangkaikai@sjtu.edu.cn (K.F.); hgao13@sjtu.edu.cn (G.H.); zhiminsha@sjtu.edu.cn (Z.S.)

\* Correspondence: clk@sjtu.edu.cn

Supporting Information Includes:

- 2 tables

Table S1. Soil physicochemical characteristics in experimental site.

| pH   | BD (g cm <sup>3</sup> ) | SOC (g kg <sup>-1</sup> ) | TN (g kg <sup>-1</sup> ) | TP (g kg <sup>-1</sup> ) | TK (g kg <sup>-1</sup> ) |
|------|-------------------------|---------------------------|--------------------------|--------------------------|--------------------------|
| 7.71 | 1.20                    | 12.66                     | 1.02                     | 0.48                     | 7.28                     |

Table S2. The physicochemical properties of organic fertilizer.

| pH   | SOC<br>(g kg <sup>-1</sup> ) | TN<br>(g kg <sup>-1</sup> ) | TP<br>(g kg <sup>-1</sup> ) | TK<br>(g kg <sup>-1</sup> ) | C/N   | C/P   | N/P  |
|------|------------------------------|-----------------------------|-----------------------------|-----------------------------|-------|-------|------|
| 8.26 | 249.36                       | 23.08                       | 12.16                       | 21.73                       | 10.80 | 20.51 | 1.90 |
